# Supplementary material
Source: MDPI journal article supplement (https://www.mdpi.com/2227-9040/10/6/207)

## **A ratiometric selective fluorescent probe derived from pyrene for Cu<sup>2+</sup> detection**

Chunwei Yu <sup>1,4,5†</sup>, Mei Yang <sup>2†</sup>, Shuhua Cui <sup>3</sup>, Yuxiang Ji <sup>1</sup> and Jun Zhang <sup>1,4,5\*</sup>

<sup>1</sup> *School of Tropical Medicine, Hainan Medical University, Haikou 571199, China; hy0211049@hainmc.edu.cn (C.Y.); hy0211012@hainmc.edu.cn (Y.J.)*

<sup>2</sup> *School of Public Health and One Health, Hainan Medical University, Haikou 571101, China; yang24364@hainmc.edu.cn (Yang, M.)*

<sup>3</sup> *School of Chemical Engineering and Environment, Weifang University of Science and Technology, Shouguang 262700, China; cuishuhua@wfust.edu.cn (Cui, S)*

<sup>4</sup> *Key Laboratory of Tropical Translational Medicine of Ministry of Education, Hainan Medical University, Haikou 571199, China;*

<sup>5</sup> *NHC Key Laboratory of Control of Tropical Diseases, School of Tropical Medicine, Hainan Medical University, Haikou 571199, China;*

*\* Correspondence: hy0211045@hainmc.edu.cn (Zhang, J)*

*† These authors contributed equally to this work.*

**Figure S1** ESI-MS spectra of P

**Figure S2** <sup>1</sup>H NMR spectra of P

**Figure S3** <sup>13</sup>C NMR spectra of P

**Figure S4** ESI-MS spectra of P<sub>1</sub>

**Figure S5** Fluorescence response of P(1.0 μM) to 10 μM of Cu<sup>2+</sup> or the mixture of 50 μM of other metal ions with 10 μM of Cu<sup>2+</sup>.

**Figure S6** Job's plot for determining the stoichiometry of P and Cu<sup>2+</sup>. The total concentration was kept 10 μM.

**Figure S7** Benesi-Hildebrand plot of P, assuming 1:1 stoichiometry for association between P and Cu<sup>2+</sup>.

**Figure S8** ESI-MS spectra of P-Cu<sup>2+</sup>.

**Figure S9** Cell viability values (%) estimated by MTT proliferation test versus incubation concentrations of P. HeLa cells were cultured with P in the concentration of 0–10 μM.

**Figure S1**

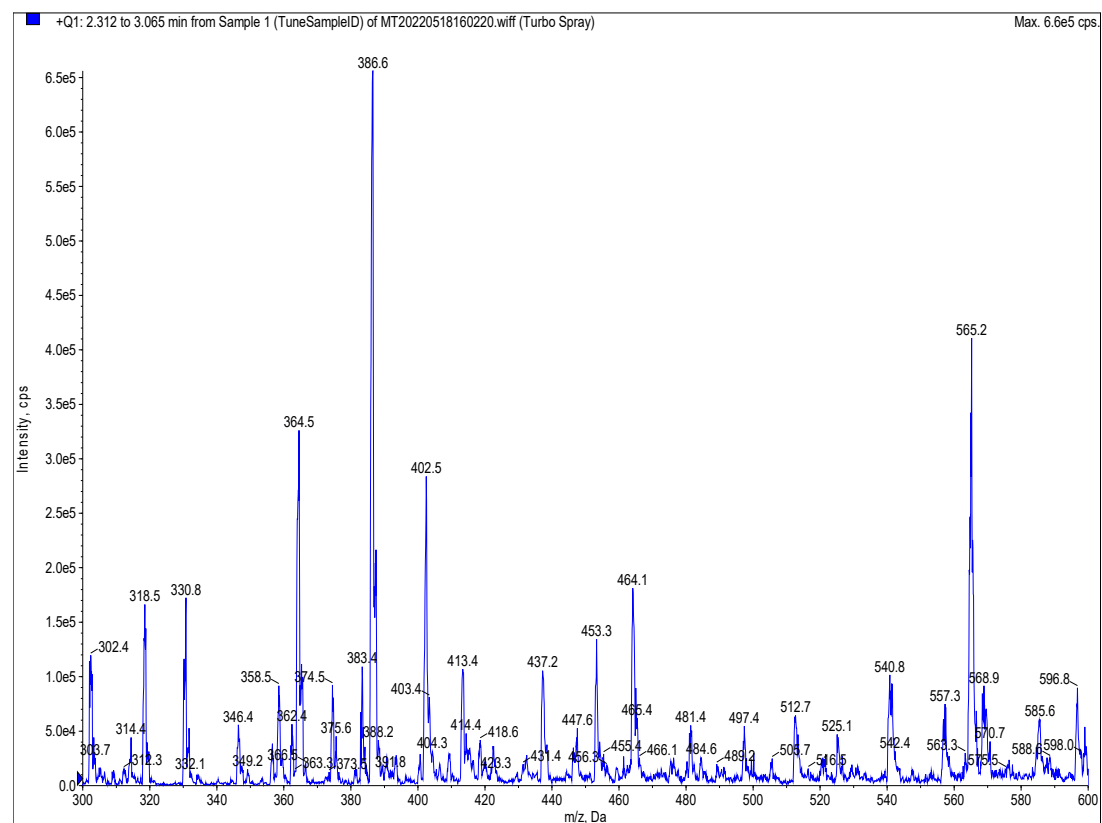

Figure S2

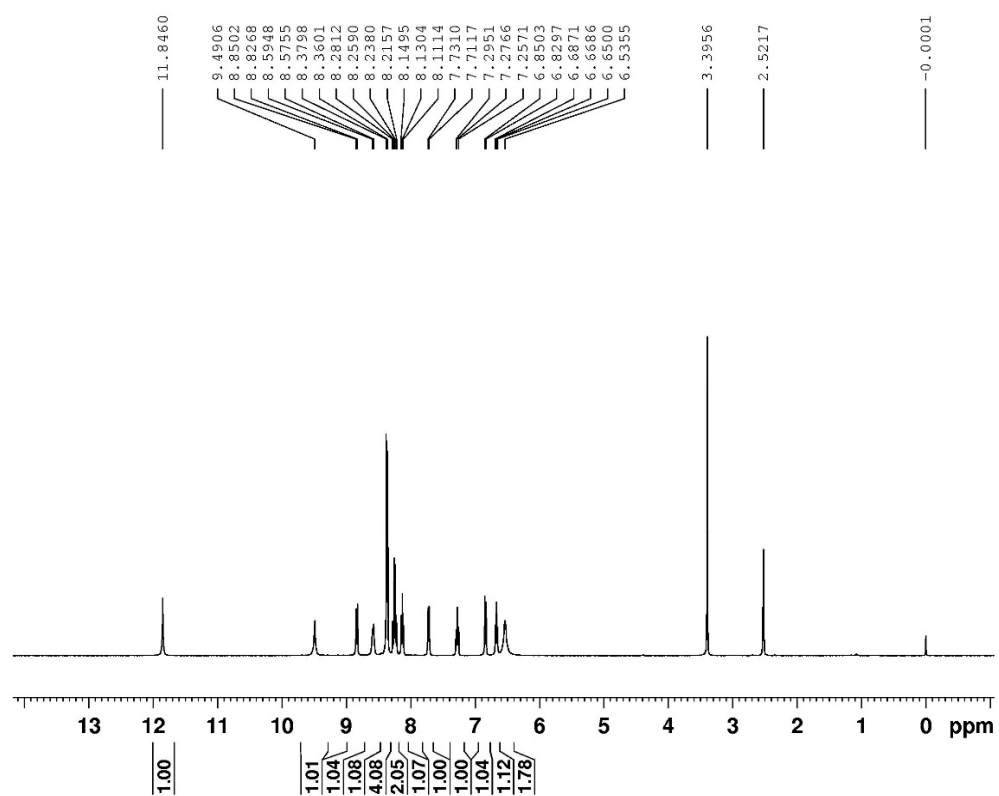

**Figure S3**

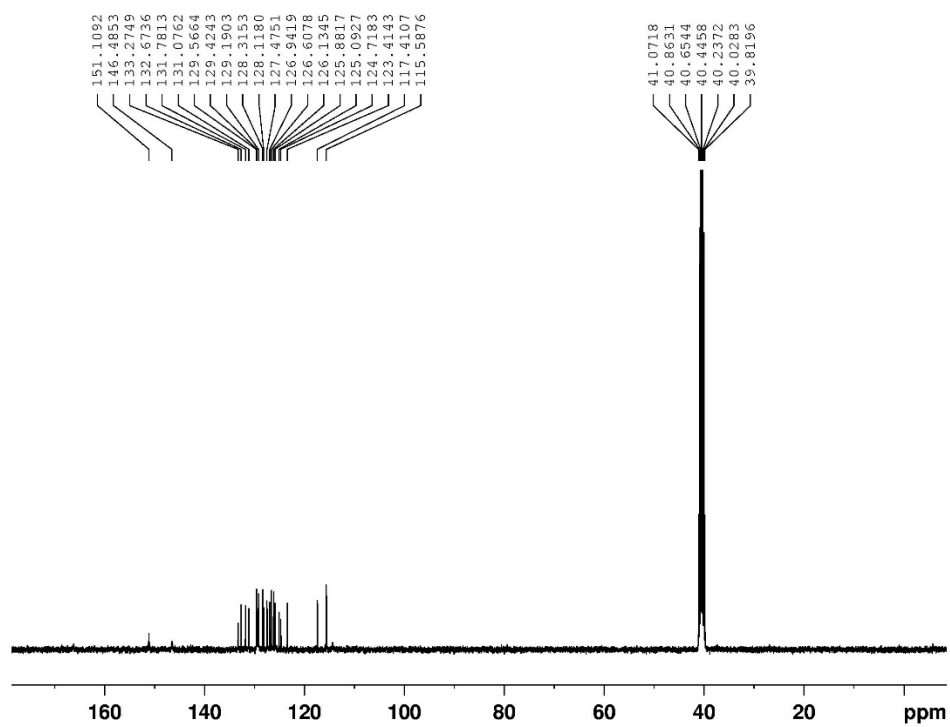

Figure S4

3 #17 RT: 0.27 AV: 1 NL: 5.52E3  
F: ITMS + c ESI Full ms [50.00-2000.00]

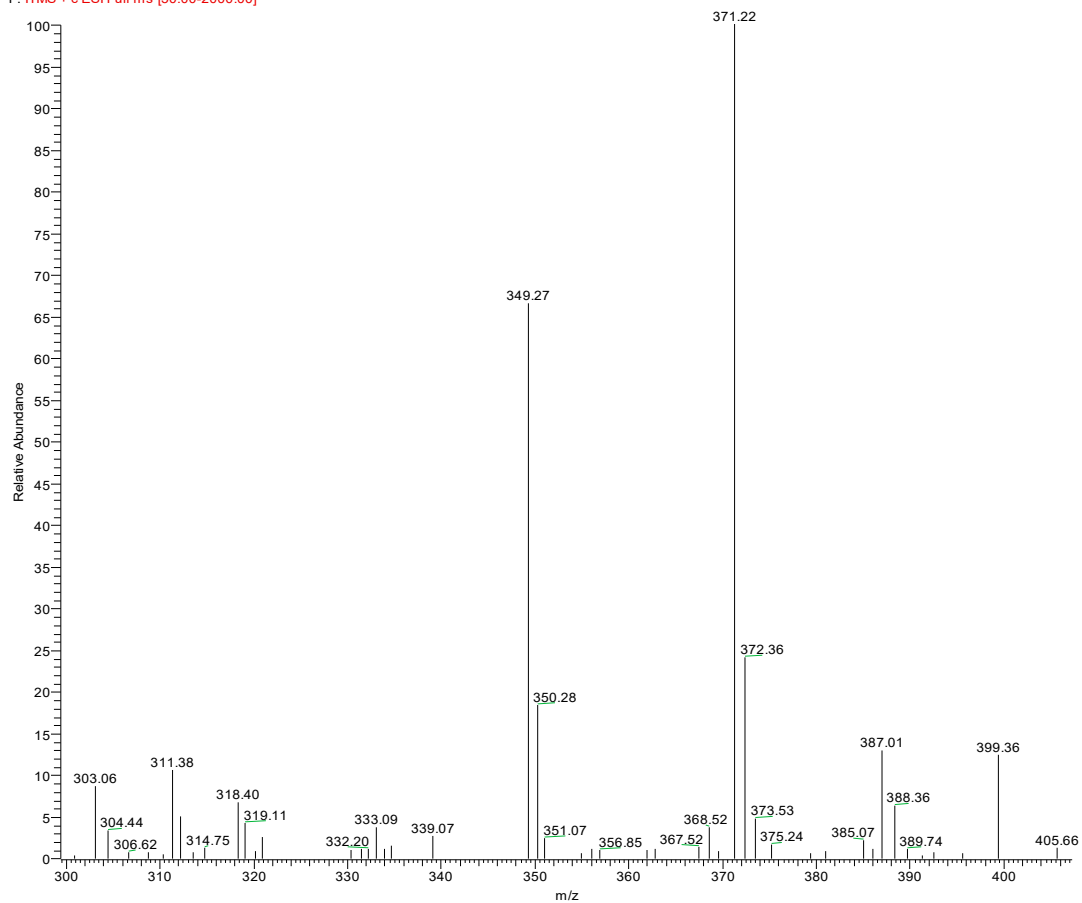

**Figure S5**

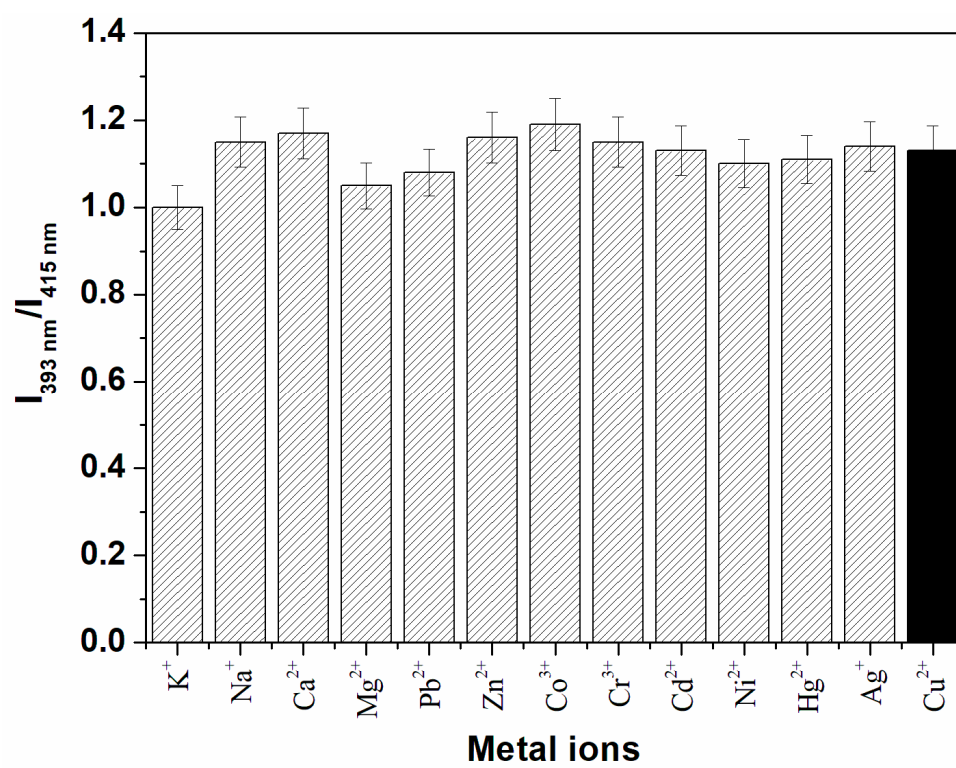

**Figure S6**

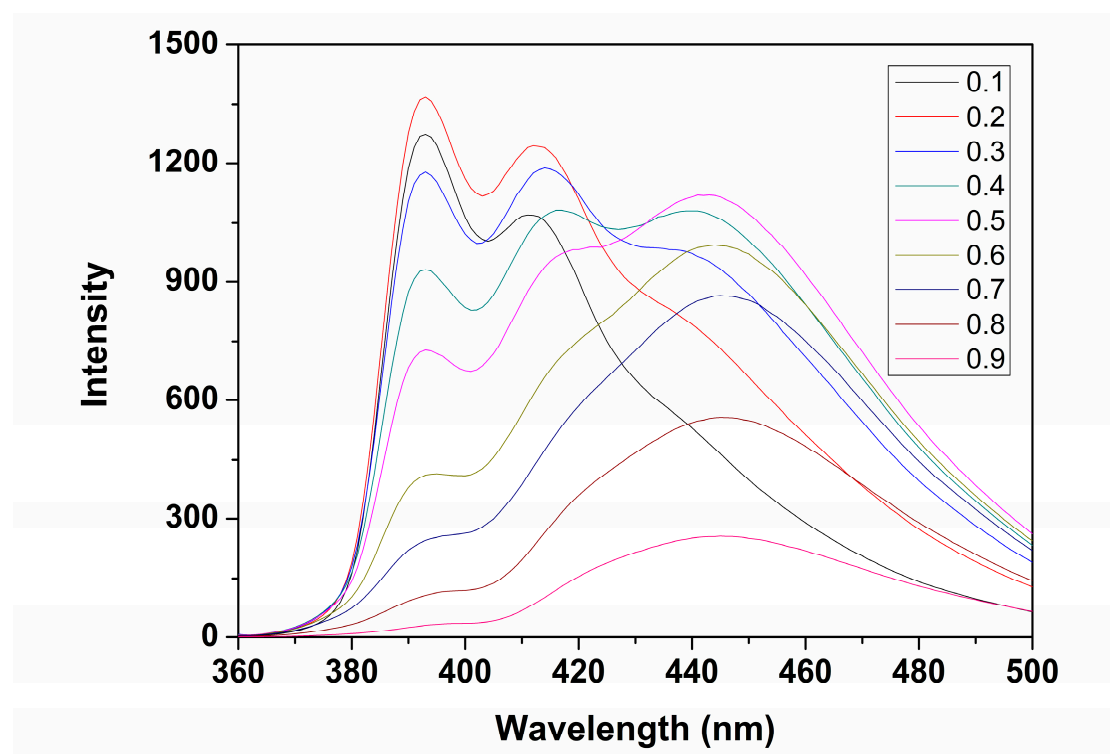

Figure S7

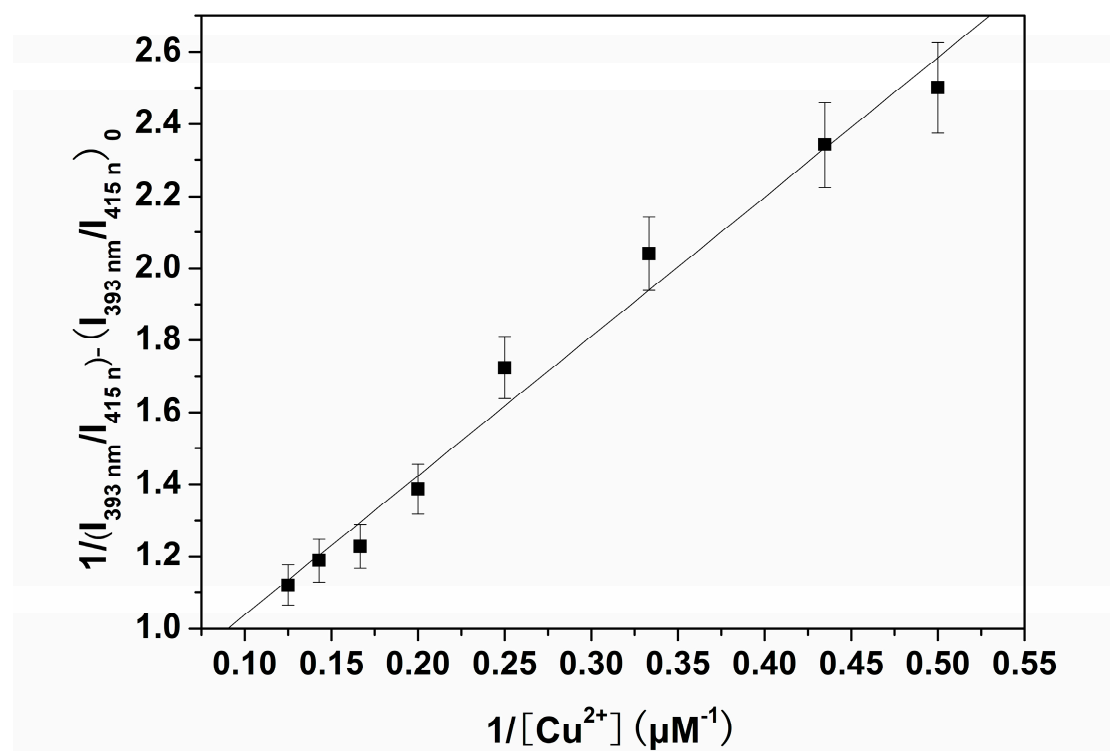



**Figure S8**

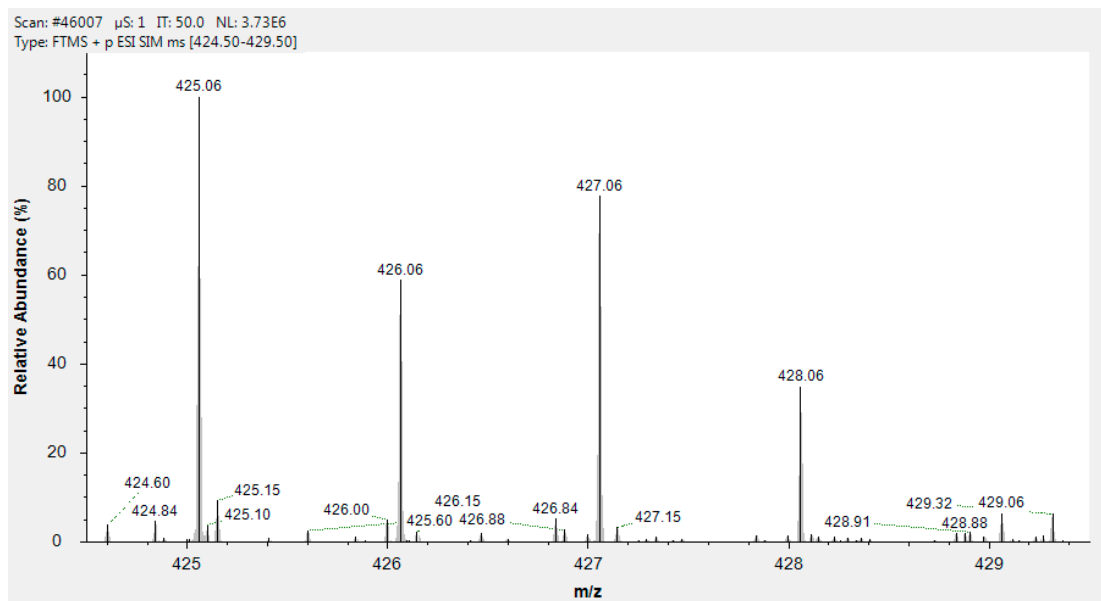

**Figure S9**

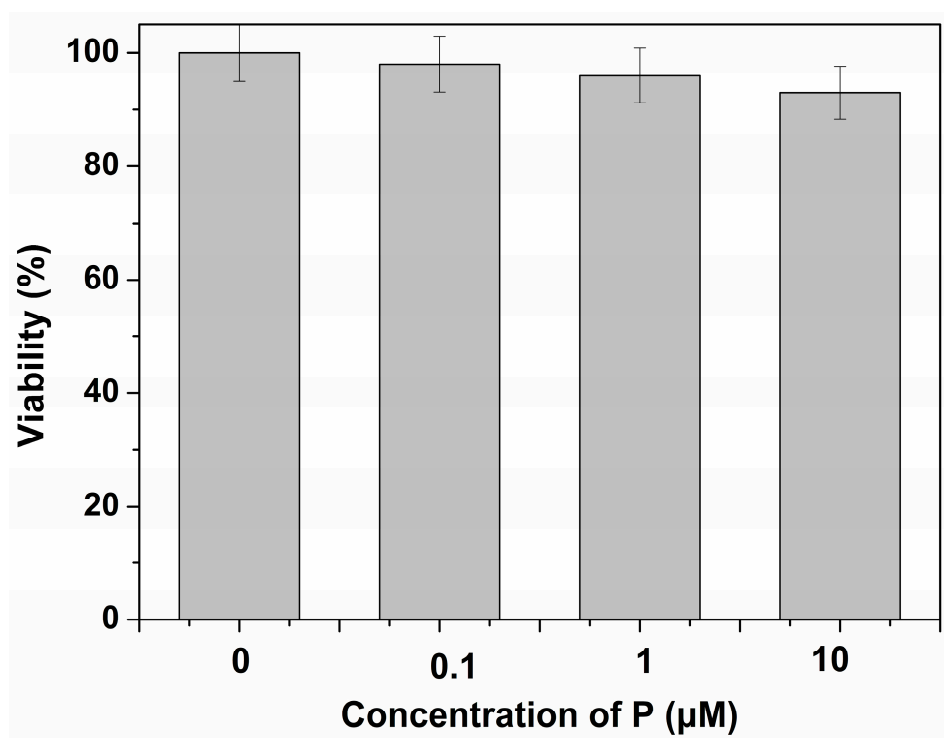

Supplement: s1 [file s1]
